# Supplementary material for: Young children do not require perceptual-motor feedback to solve Aesop’s Fable tasks
Source: PeerJ. 2017 Jul 17;5:e3484. doi: 10.7717/peerj.3484 (PMC5516770; doi:10.7717/peerj.3484)
Supplement: Supplemental Information 2 [file peerj-05-3484-s004.xlsx]

## Sheet: Miller, Jelbert et al. Data Set
ID	Age	Gender	T1 Large vs. Small Obj	T2 Large vs. Small Obj	T3 Large vs. Small Obj	T4 Large vs. Small Obj	T5 Large vs. Small Obj	T1 Too Large vs. Small Obj	T2 Too Large vs. Small Obj	T3 Too Large vs. Small Obj	T4 Too Large vs. Small Obj	T5 Too Large vs. Small Obj	T1 Floating vs. Heavy	T2 Floating vs. Heavy	T3 Floating vs. Heavy	T4 Floating vs. Heavy	T5 Floating vs. Heavy	T1 Hollow vs. Solid	T2 Hollow vs. Solid	T3 Hollow vs. Solid	T4 Hollow vs. Solid	T5 Hollow vs. Solid	T1 Wide vs. Narrow Tube	T2 Wide vs. Narrow Tube	T3 Wide vs. Narrow Tube	T4 Wide vs. Narrow Tube	T5 Wide vs. Narrow Tube	T1 High vs. Low Water	T2 High vs. Low Water	T3 High vs. Low Water	T4 High vs. Low Water	T5 High vs. Low Water
1	5	F	0	0	0	0	0	1	1	1	1	1	0	1	1	1	1	0	1	1	1	1	0	0	0	0	0	1	0	1	1	1
2	5	F	0	0	0	0	0	0	1	1	0	1	0	1	1	1	0	0	0	0	1	0	1	0	0	0	0	1	1	1	1	1
3	5	M	1	0	0	0	0	1	0	0	1	1	0	1	1	1	1	0	1	0	1	0	0	1	1	1	0	1	0	1	1	1
4	5	F	1	0	1	1	1	0	1	0	1	1	1	1	1	1	1	1	0	1	1	1	1	0	0	0	0	1	0	1	1	1
5	5	M	1	0	0	1	0	0	1	1	1	1	0	0	1	0	1	0	0	0	1	0	0	0	0	1	1	1	1	1	1	1
6	5	F	1	0	1	0	1	1	1	0	0	1	1	0	1	1	1	0	1	0	1	1	0	0	0	0	0	1	1	1	1	1
7	5	F	1	1	1	0	0	0	1	1	1	1	1	0	0	0	1	0	1	0	0	1	0	0	0	0	0	1	1	1	1	1
8	5	M	0	1	0	1	1	0	1	1	1	0	0	0	1	1	0	1	0	1	0	1	1	0	0	0	0	1	1	0	1	0
9	5	M	0	0	0	1	1	0	1	0	1	0	0	1	0	1	1	0	0	1	0	1	0	0	1	0	0	1	1	1	1	0
10	5	M	1	1	1	1	1	0	1	1	1	1	0	0	0	0	1	0	0	1	0	1	0	0	0	1	0	1	1	1	1	1
11	6	F	0	0	0	0	1	1	1	1	1	0	0	1	0	1	1	1	1	1	1	0	0	0	0	0	0	1	1	1	1	1
12	6	F	1	0	1	0	0	0	1	1	1	1	1	1	1	1	1	1	1	1	1	1	1	0	1	0	1	1	1	1	1	1
13	6	M	1	1	1	1	1	0	1	1	1	0	1	1	1	1	1	1	1	1	1	1	0	0	0	1	1	1	1	1	1	1
14	6	F	1	1	1	1	1	0	1	1	1	1	0	1	1	1	1	0	0	1	1	1	1	0	0	0	0	1	1	1	1	1
15	6	M	1	0	1	0	1	0	1	1	1	1	0	1	1	1	1	1	1	0	1	0	0	0	0	0	0	1	1	1	1	1
16	6	M	1	1	1	1	0	0	1	1	1	0	0	1	0	0	1	0	0	1	0	1	0	0	0	0	0	1	0	1	1	1
17	6	M	1	1	1	1	1	1	0	0	1	1	0	1	0	1	1	0	1	1	1	1	0	1	1	1	1	0	1	1	1	1
18	6	F	1	0	0	0	0	1	0	1	1	1	1	1	0	1	0	0	1	1	1	0	1	0	0	?	0	1	1	1	1	1
19	6	F	0	0	0	1	0	0	1	1	0	1	0	0	1	0	0	0	1	0	0	0	0	0	0	0	0	0	1	1	1	1
20	6	M	1	0	1	1	1	0	1	1	1	1	1	0	1	1	1	0	1	1	1	1	1	1	1	1	0	1	1	1	1	1
21	6	F	1	1	1	0	1	0	1	0	1	0	1	0	1	1	0	1	0	0	1	1	0	1	1	1	1	1	1	1	1	1
22	6	F	1	1	1	1	1	0	1	1	1	1	1	1	1	1	0	1	1	0	1	1	0	0	0	1	1	1	1	1	1	1
23	6	M	1	1	1	1	1	0	1	1	0	1	1	1	1	1	1	1	1	1	1	1	0	0	0	0	1	0	1	0	1	1
24	7	F	1	1	1	0	1	1	1	1	1	0	1	1	1	1	1	1	1	1	1	1	0	1	1	1	1	1	1	1	0	0
25	7	M	1	0	0	0	0	0	1	1	1	1	1	1	1	1	1	1	1	1	0	1	1	1	1	1	1	1	1	0	1	1
26	7	F	1	1	1	1	1	0	1	1	1	1	1	1	1	1	1	1	1	1	1	1	0	0	1	1	1	0	1	1	1	1
27	7	M	1	0	1	1	1	1	1	0	1	1	0	1	1	1	1	0	1	0	1	1	1	1	0	?	0	1	1	1	1	1
28	7	F	1	0	0	0	0	1	1	1	1	0	1	1	1	1	0	1	1	0	0	0	1	1	0	0	0	1	1	1	1	1
29	7	M	1	1	1	1	0	0	1	1	1	1	1	1	1	1	1	1	1	1	1	1	0	1	0	1	1	0	1	0	1	1
30	7	M	1	1	1	1	1	0	1	0	1	1	1	1	1	1	1	1	1	1	1	1	1	0	1	1	1	1	1	1	1	1
31	7	F	1	1	1	1	1	0	1	1	1	1	1	1	1	1	1	1	1	1	1	1	1	1	1	1	1	1	1	1	1	1
32	7	M	0	0	1	1	1	1	0	1	1	1	1	1	1	1	1	1	1	1	1	1	0	1	0	0	0	0	0	1	0	1
33	7	F	1	1	1	1	1	0	1	1	1	1	1	1	1	1	1	1	1	1	1	1	1	0	1	1	1	1	1	1	1	1
34	7	F	0	0	1	0	0	1	1	1	1	1	0	0	1	1	1	0	0	1	1	1	0	1	1	1	1	0	0	0	0	0
35	8	M	1	1	1	1	1	0	1	1	1	1	1	1	1	1	1	1	1	1	0	1	1	0	1	1	1	1	1	1	1	1
36	8	F	1	1	1	1	1	1	0	1	1	1	1	1	1	1	1	1	1	1	1	1	0	1	1	1	1	1	1	1	0	1
37	8	M	1	1	0	0	1	1	0	1	1	1	0	1	1	1	1	0	1	0	0	0	0	0	0	0	1	1	1	1	1	1
38	8	M	1	1	1	1	1	0	1	1	1	1	1	1	1	1	1	1	1	1	1	1	0	0	1	0	0	1	1	1	1	1
39	8	F	1	1	1	1	1	0	1	1	1	1	1	1	1	1	1	1	1	1	1	1	1	1	1	1	1	1	0	1	1	1
40	8	F	1	0	1	1	1	0	1	1	1	1	1	1	1	1	1	1	1	1	1	1	0	1	0	0	1	1	1	1	1	1
41	8	M	1	1	1	1	1	0	0	1	1	1	1	1	1	1	1	1	1	1	1	1	1	0	1	1	1	1	1	1	1	1
42	8	F	1	1	1	1	1	0	1	1	1	1	1	1	1	1	1	1	0	1	1	1	1	0	1	1	1	1	1	1	1	1
43	8	F	1	0	1	1	1	0	1	1	1	0	1	0	1	1	1	1	0	1	1	1	1	0	1	1	1	1	0	1	1	0
44	8	F	1	1	1	1	0	1	1	0	1	1	1	1	1	1	1	1	0	1	1	1	1	1	1	1	1	1	1	1	1	1
45	8	F	1	1	1	1	1	0	1	1	1	1	1	1	1	1	1	1	1	1	1	1	0	0	0	1	1	1	1	1	1	1
46	9	M	1	1	1	1	1	1	1	1	1	1	1	1	1	1	1	1	1	1	1	1	1	1	1	1	1	0	1	1	1	1
47	9	M	0	0	1	1	0	1	0	1	1	1	1	0	1	1	1	0	0	1	1	1	1	0	0	0	0	1	1	1	1	1
48	9	M	1	1	1	1	1	0	1	1	1	1	1	1	1	1	1	0	1	1	1	1	1	1	1	1	1	1	0	0	0	1
49	9	M	1	1	1	1	1	1	1	1	1	1	1	1	1	1	1	1	1	0	1	1	1	1	1	1	1	1	1	0	0	1
50	9	M	1	1	1	1	1	0	1	1	1	1	1	1	1	1	1	1	1	1	1	1	1	0	0	1	1	1	1	1	1	1
51	9	M	1	1	1	1	1	1	1	1	1	1	1	1	1	1	1	1	1	1	1	1	0	0	0	0	0	1	1	1	1	1
52	9	F	1	1	1	1	1	1	0	1	1	1	1	0	1	1	1	1	0	1	1	0	0	1	0	0	0	1	1	1	1	1
53	9	M	1	1	1	1	1	0	1	1	1	1	1	1	1	1	1	1	1	1	1	1	1	1	1	1	1	0	1	1	1	1
54	9	F	1	0	1	1	1	1	0	1	1	0	0	1	1	0	1	1	0	1	1	1	0	1	0	0	1	0	1	0	0	1
55	9	F	1	1	1	1	1	0	1	1	1	1	1	1	1	1	1	1	1	1	1	1	1	1	1	1	1	1	1	1	1	1
